# Supplementary material for: Beta‐blockers exert potent anti‐tumor effects in cutaneous and uveal melanoma
Source: PubMed Central journal article supplement (PMC6885887; doi:10.1002/cam4.2594), 2019-10-07

# Supplementary Figure 2A

UM cell line MP46

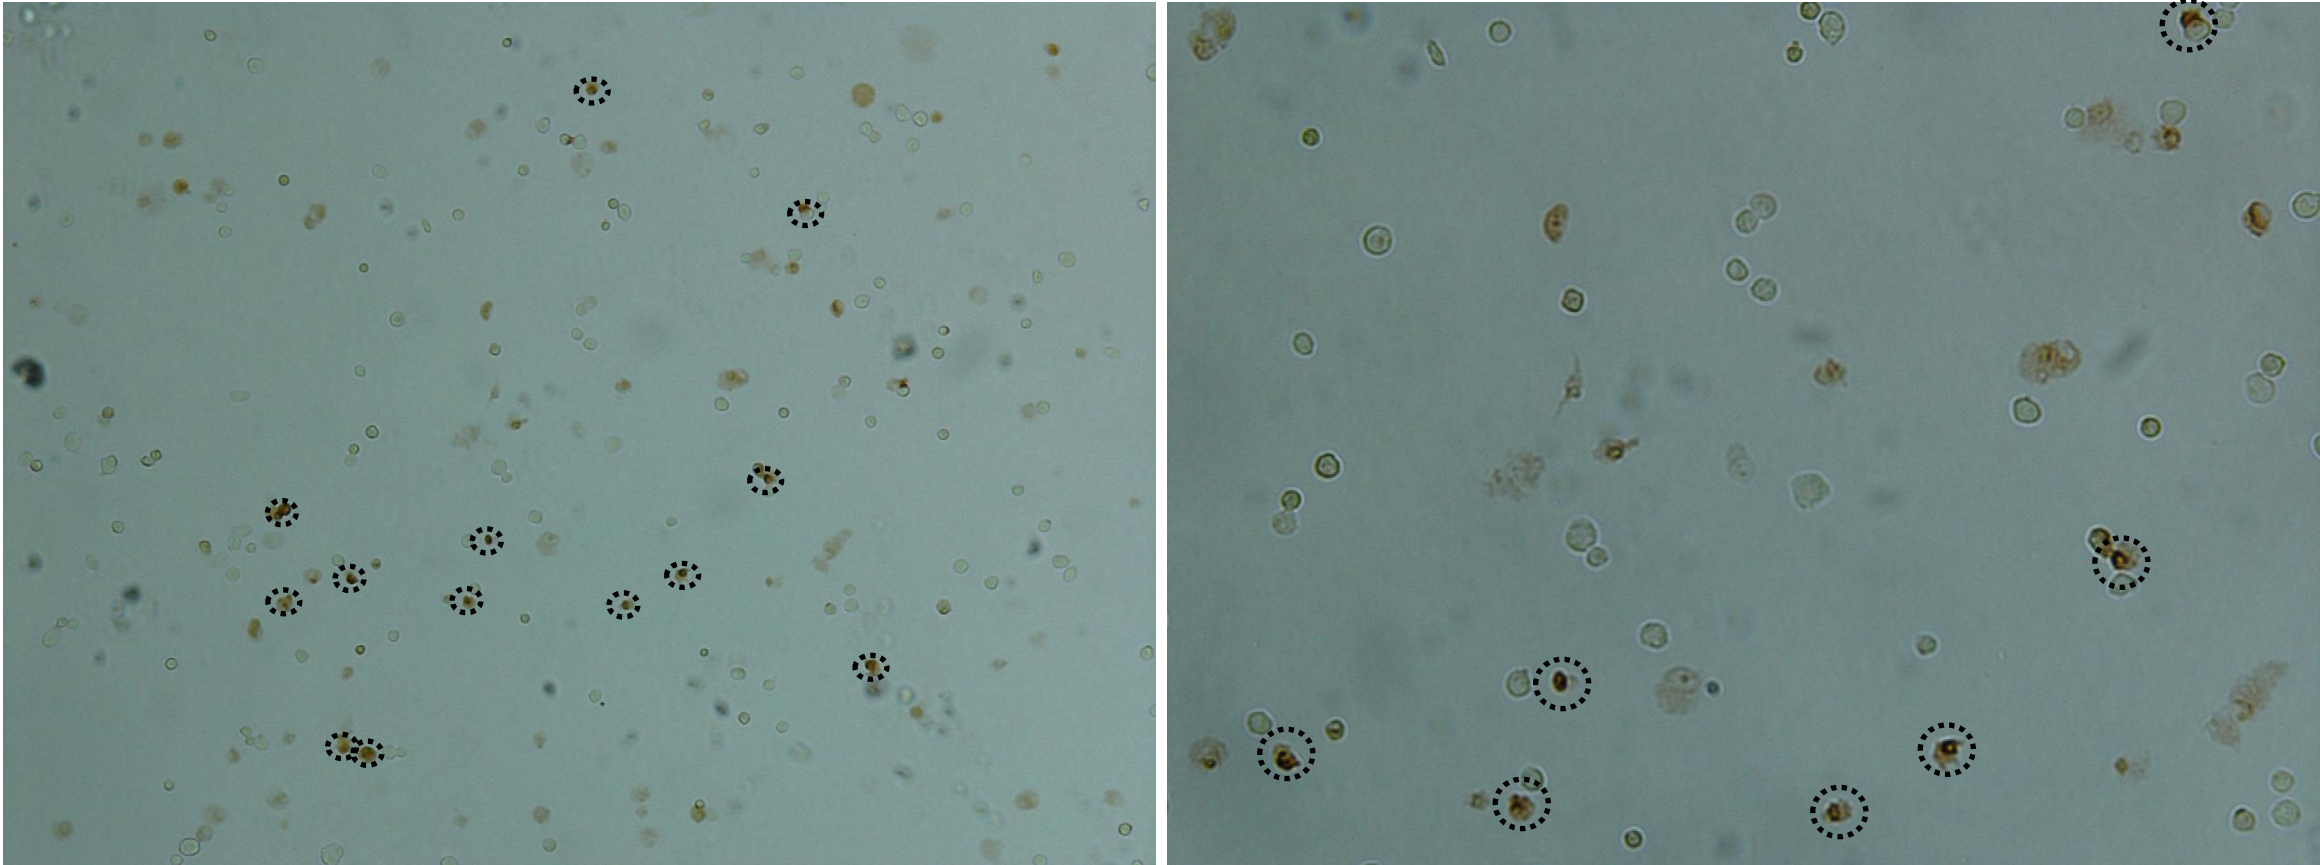

Propranolol: 200 $\mu$ M

Supplementary Figure 2B

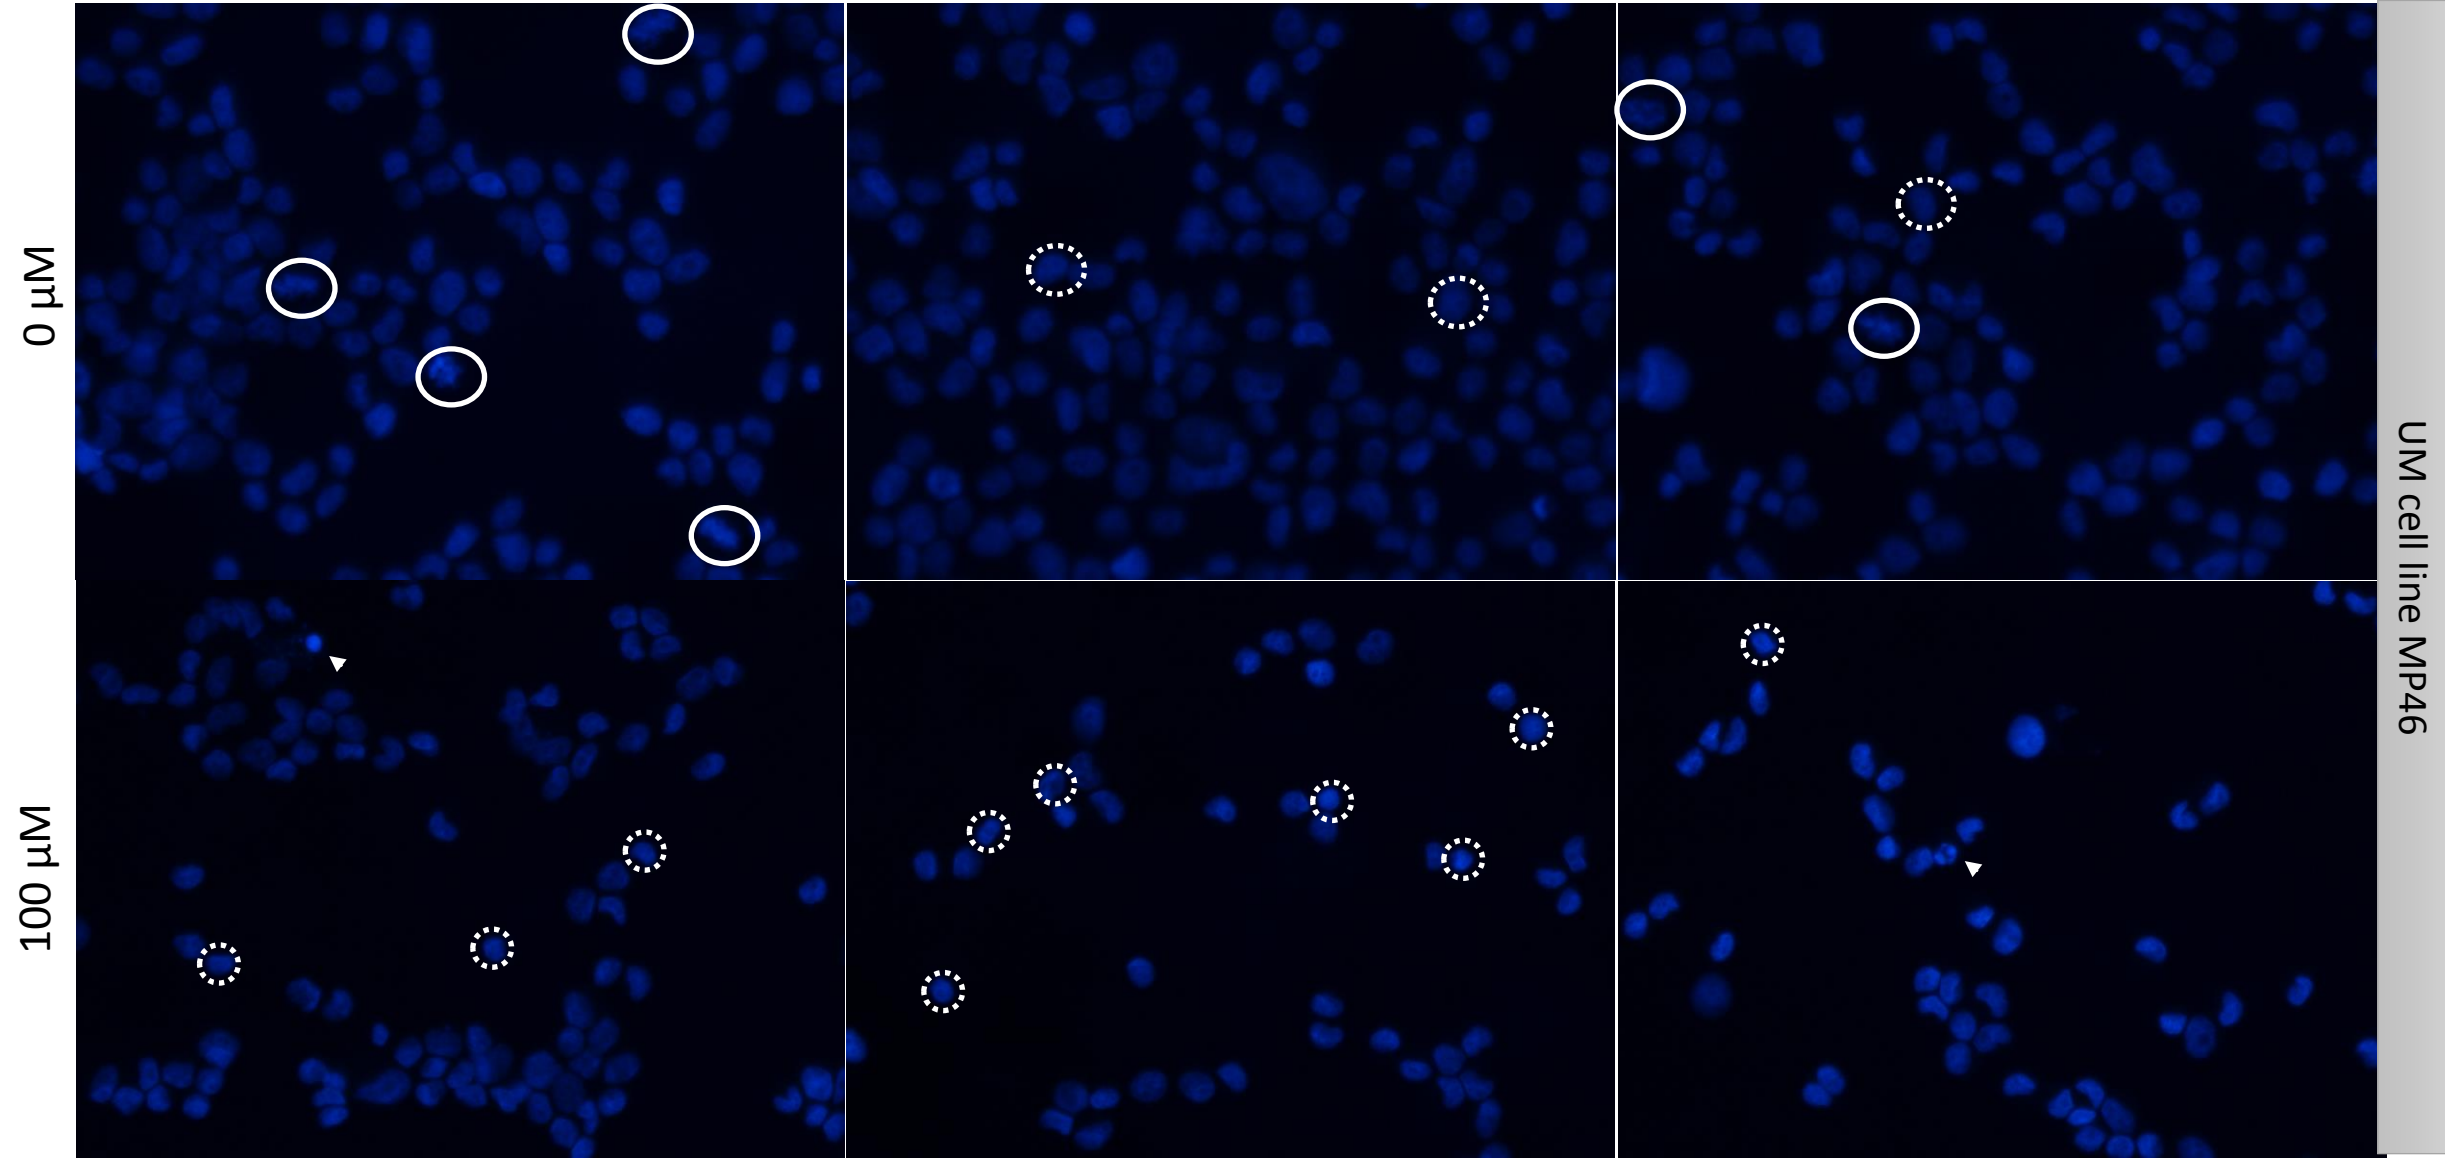

Supplement: CAM4-8-7265-s002.pdf [file CAM4-8-7265-s002.pdf]
